# Supplementary material for: Using metagenomic analysis to assess the effectiveness of oral health promotion interventions in reducing risk for pneumonia among patients with stroke in acute phase: study protocol for a randomized controlled trial
Source: Springer Nature journal article supplement (doi:10.1186/s13063-020-04528-3), 2020-07-10
Supplement: MOESM4 [file 18170152]

**CALIFORNIA JURAT WITH AFFIANT STATEMENT**

GOVERNMENT CODE § 8202

- ☒ See Attached Document (Notary to cross out lines 1-6 below)  
☐ See Statement Below (Lines 1-6 to be completed only by document signer[s], *not* Notary)

\_\_\_\_\_  
Signature of Document Signer No. 1\_\_\_\_\_  
Signature of Document Signer No. 2 (if any)

A notary public or other officer completing this certificate verifies only the identity of the individual who signed the document to which this certificate is attached, and not the truthfulness, accuracy, or validity of that document.

State of California

County of San Diego

Subscribed and sworn to (or affirmed) before me

on this 7<sup>th</sup> day of December, 2017,  
by                      Date Month Year(1) Yu Zhao(and (2) \_\_\_\_\_),  
Name(s) of Signer(s)proved to me on the basis of satisfactory evidence  
to be the person(s) who appeared before me.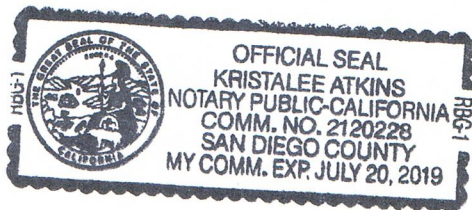Signature Kristalee Atkins  
Signature of Notary PublicSeal  
Place Notary Seal Above**OPTIONAL**

Though this section is optional, completing this information can deter alteration of the document or fraudulent reattachment of this form to an unintended document.

**Description of Attached Document**Title or Type of Document: Translator's Declaration Document Date: 12/7/2017Number of Pages: 3 Signer(s) Other Than Named Above: \_\_\_\_\_

## TRANSLATOR'S DECLARATION

STATE OF CALIFORNIA

COUNTY OF SAN DIEGO

I, Yu Zhao, declare that I am a member of the American Translators Association (member number 265081), am fluent in English and Chinese, can translate from Chinese to English and from English to Chinese. I further declare that I have translated the document stated below and which is attached to this declaration:

**Proposal of Funding Project**

*(Title of Document)*

I declare that, to the best of my knowledge and abilities, the attached document in English is a true and accurate translation of the attached document in Chinese.

I declare under penalty of perjury under the laws of the State of California that the foregoing is true and correct.

This declaration is signed this 7<sup>th</sup> day of December, 2017, in Oceanside, California,  
U.S.A.

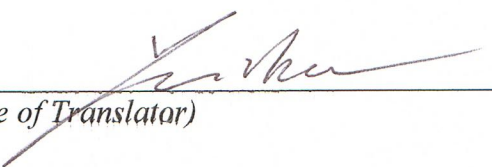  
*(Signature of Translator)*

Yu Zhao

*(Print Name)*

|                              |                    |
|------------------------------|--------------------|
| Project Approval No.         | 81701036           |
| Project Code:                | H1411              |
| Centralized Management Unit: |                    |
| Supporting Institution Code: | 23003208A0017-0029 |

817010361010830.00

## National Natural Science Foundation of China

### Proposal of Funding Project

Funding category: Youth Science Funding Project

Subclass description: \_\_\_\_\_

Notes: \_\_\_\_\_

Project title: Research of the Effect of Oral Health Promotion on Pneumonia  
Complication Stroke

Direct cost: 190,000 RMB      Project duration: Jan, 2018 - Dec, 2020

Principal: DAI, RUOXI

Mailing address: 81 Meixi Road, Hefei City, Anhui Province

Zip code: 230032      Telephone: 0551-65118677

Email: dairuoxi@gmail.com

Supporting institution Anhui Medical University

Contact person: Ke, Daoping      Telephone: 0551-65161053

Application date: August 22, 2017

**Under the Supervision of National Natural Science Foundation of China**

Version: L010830



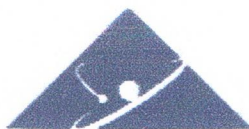

|        |                    |
|--------|--------------------|
| 项目批准号  | 81701036           |
| 申请代码   | H1411              |
| 归口管理部门 |                    |
| 依托单位代码 | 23003208A0017-0029 |

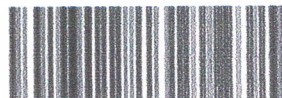

81701036 1010830

# 国家自然科学基金委员会 资助项目计划书

资助类别: 青年科学基金项目

亚类说明:

附注说明:

项目名称: 口腔健康促进对脑卒中肺炎并发症作用的研究

直接费用: 19万元 执行年限: 2018.01-2020.12

负责人: 戴若曦

通讯地址: 安徽省合肥市梅山路81号

邮政编码: 230032 电 话: 0551-65118677

电子邮件: dairuoxi@gmail.com

依托单位: 安徽医科大学

联系人: 柯道平 电 话: 0551-65161053

填表日期: 2017年08月22日

国家自然科学基金委员会制
